## The impact of different preventive counseling programs on medication adherence in patients with paroxysmal atrial fibrillation after catheter ablation

Pogosova N.<sup>1</sup>; Ovchinnikova AI.<sup>2</sup>; Yufereva YM.<sup>1</sup>; Sokolova OY.<sup>1</sup>; Davtyan KV.<sup>3</sup>; Ausheva AK.<sup>1</sup>

<sup>1</sup>National Medical Research Center of Cardiology, Moscow, Russian Federation

<sup>2</sup>Federal State Budgetary Institution "9 Diagnostic and Treatment Center" of the Ministry of Defense, Moscow, Russian Federation

<sup>3</sup>National Center for Preventive Medicine, Moscow, Russian Federation

**Funding Acknowledgements:** Type of funding sources: None.

**Background:** Poor medication adherence is a major contributor to suboptimal health outcomes and increased costs in cardiovascular (CV) diseases including atrial fibrillation (AF).

**Purpose:** To assess the impact of different preventive counseling programs on medication adherence in AF patients (pts) after catheter ablation (CA).

**Methods:** A prospective randomized controlled study with 3 parallel groups of pts with paroxysmal AF after CA (radiofrequency or cryoablation). Pts were randomized (1:1:1) into 3 groups. Before discharge, pts from all groups received 1 preventive counseling session with focus on their individual risk factors profile. After discharge both intervention groups received 6 sessions of biweekly remote preventive counseling by phone (Group 1) or via email (Group 2) for 3 months after enrollment. Group 3 received usual care. Medication adherence was assessed using the 4-item Morisky-Green scale at baseline and at 12 months.

**Results:** A total of 135 pts aged 35 to 80 years were enrolled (mean age, 57.3 ± 9.1 years, men, 51.8%). The groups were well balanced according to demographic and clinical features. Baseline levels of non-adherence and partial adherence were high in all groups (53.4%, 71.1% and 73.3% respectively). At 1 year of follow-up pts from both intervention groups demonstrated a significant improvement of medication adherence vs control (table).

**Conclusions:** Preventive counseling programs with remote support via phone or e-mail improve medication adherence in AF pts after CA.

| Medication adherence | 1 group (support via phone) |                 | 2 group (support via e-mail) |                 | Control group | P for Group 1 vs. control at 12 months |                 | P for Group 2 vs. control at 12 months |  |
|----------------------|-----------------------------|-----------------|------------------------------|-----------------|---------------|----------------------------------------|-----------------|----------------------------------------|--|
|                      | Baseline                    | After 12 months | Baseline                     | After 12 months |               | Baseline                               | After 12 months |                                        |  |
| Adherence,%          | 46.7                        | 60              | 28.9                         | 60              | 26.7          | 31.1                                   | <0.01           | <0.01                                  |  |
| Partial adherence ,% | 17.8                        | 20              | 31.1                         | 20              | 24.4          | 33.3                                   | n/s             | n/s                                    |  |
| Non-adherence,%      | 35.6                        | 60              | 40                           | 20              | 48.9          | 35.6                                   | n/s             | n/s                                    |  |
